# Supplementary material
Source: PubMed Central journal article supplement (PMC3149160)

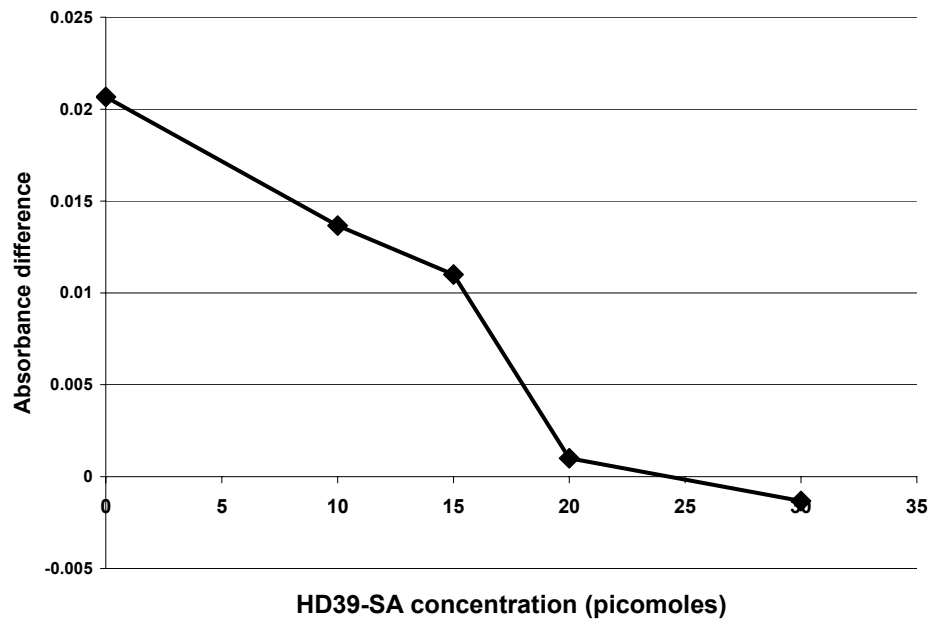

Supplemental figure 1.

Supplement: mt2011104x1.pdf [file mt2011104x1.pdf]

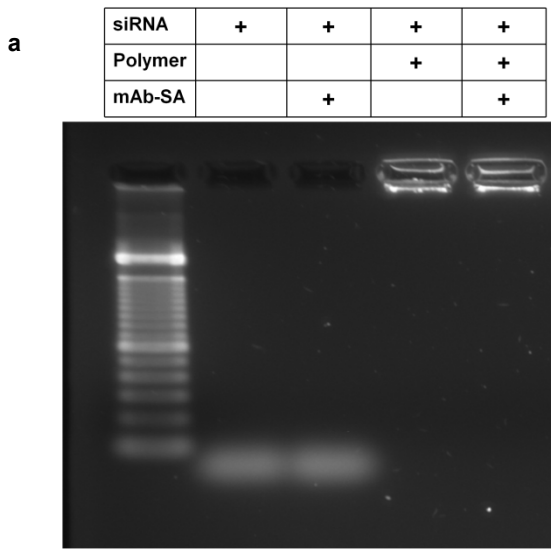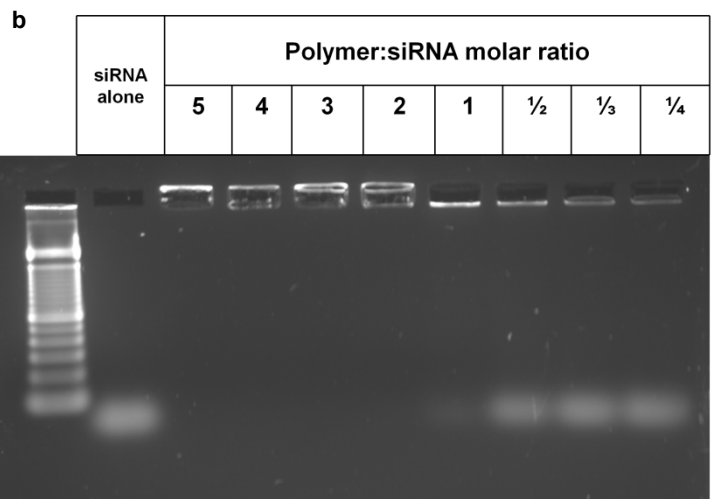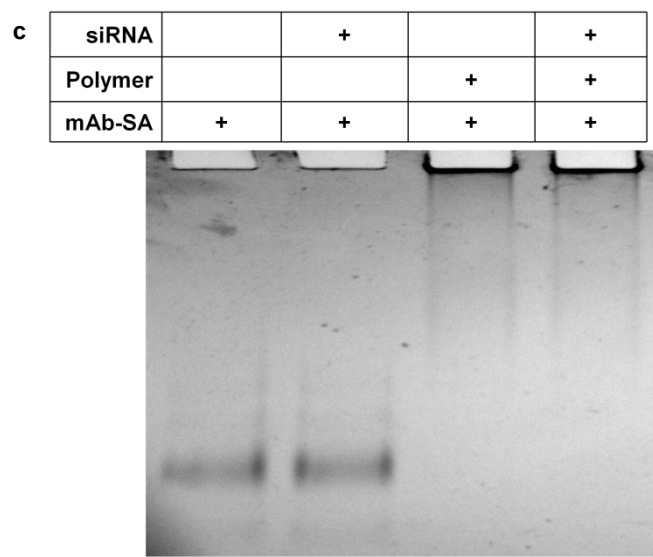

Supplemental figure 2.

Supplement: mt2011104x2.pdf [file mt2011104x2.pdf]

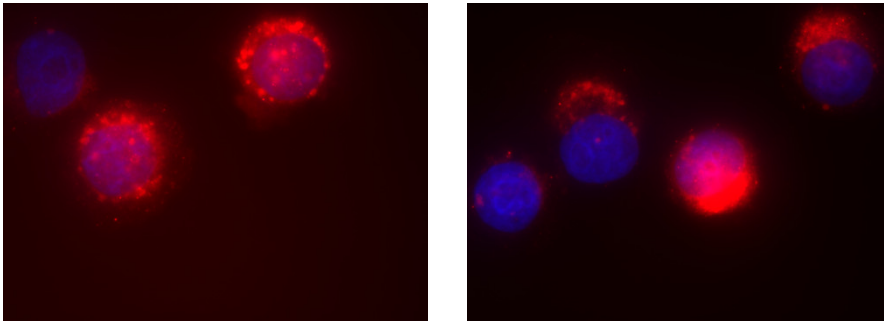

Figure S3.

Supplement: mt2011104x3.pdf [file mt2011104x3.pdf]

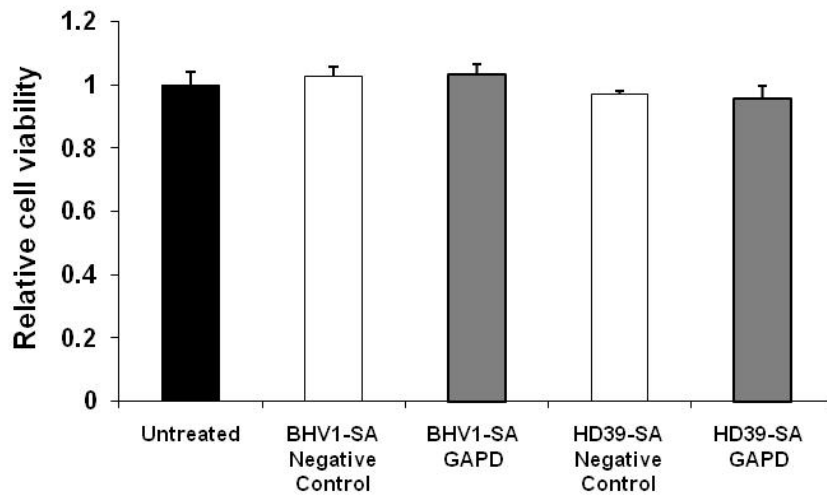

Figure S4.

Supplement: mt2011104x4.pdf [file mt2011104x4.pdf]

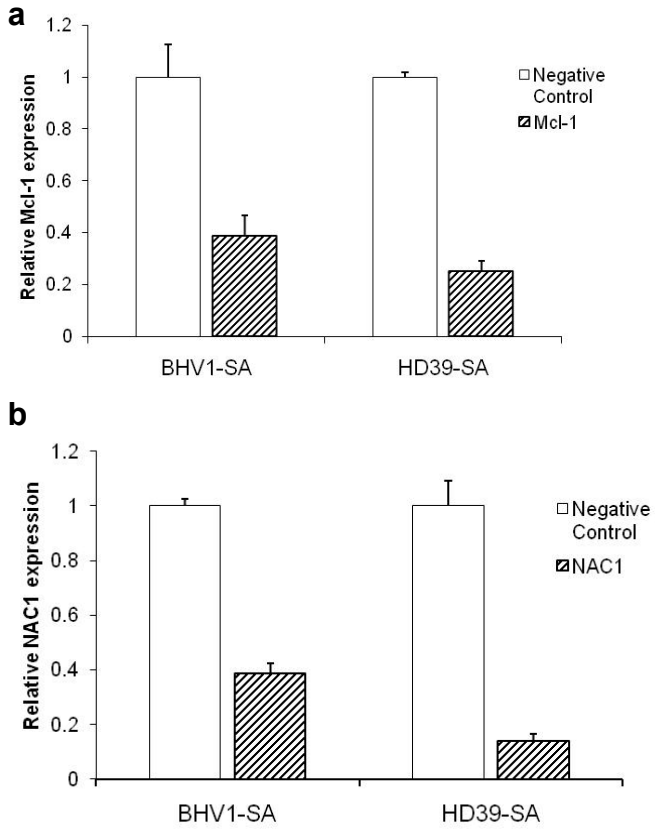

Figure S5.

Supplement: mt2011104x5.pdf [file mt2011104x5.pdf]
